# Supplementary material for: AON-based degradation of c.151C>T mutant COCH transcripts associated with dominantly inherited hearing impairment DFNA9
Source: PubMed Central journal article supplement (PMC7985667; doi:10.1016/j.omtn.2021.02.033), 2021-03-01
Supplement: mmc1.pdf [file mmc1.pdf]

**Supplemental information**

**AON-based degradation of c.151C>T mutant**

***COCH* transcripts associated with dominantly**

**inherited hearing impairment DFNA9**

**Erik de Vrieze, Jorge Cañas Martín, Jolien Peijnenborg, Aniek Martens, Jaap Oostrik, Simone van den Heuvel, Kornelia Neveling, Ronald Pennings, Hannie Kremer, and Erwin van Wijk**

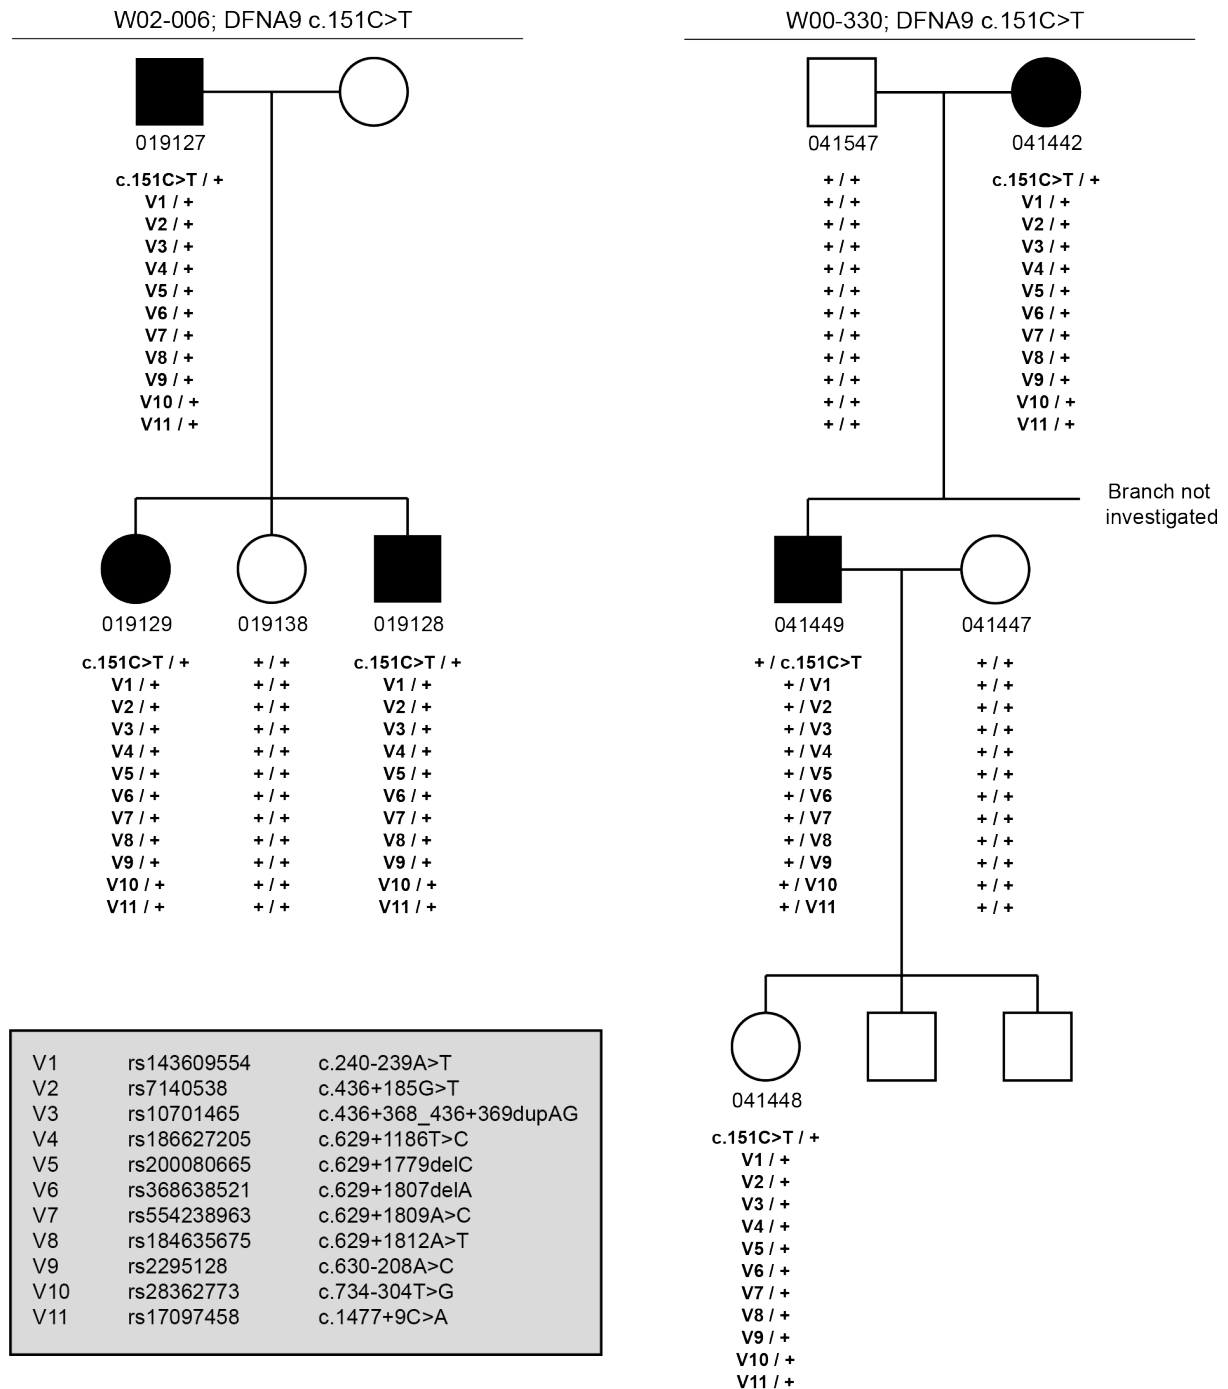

**Figure S1. Segregation analysis of haplotype-specific variants.** Small branches from the pedigrees of two large Dutch DFNA9 families (W02-006 and W00-330) were investigated to confirm co-segregation of the haplotype-specific variants with the c.151C>T mutation. Numbers below each individual depict the internal identifier of the DNA samples. Individual 041448 was not clinically affected at the time of sample collection. V1-V10: *COCH* variants (see grey box); +: wildtype; square: male; circle: female; open symbol: clinically unaffected; closed symbol: clinically affected.

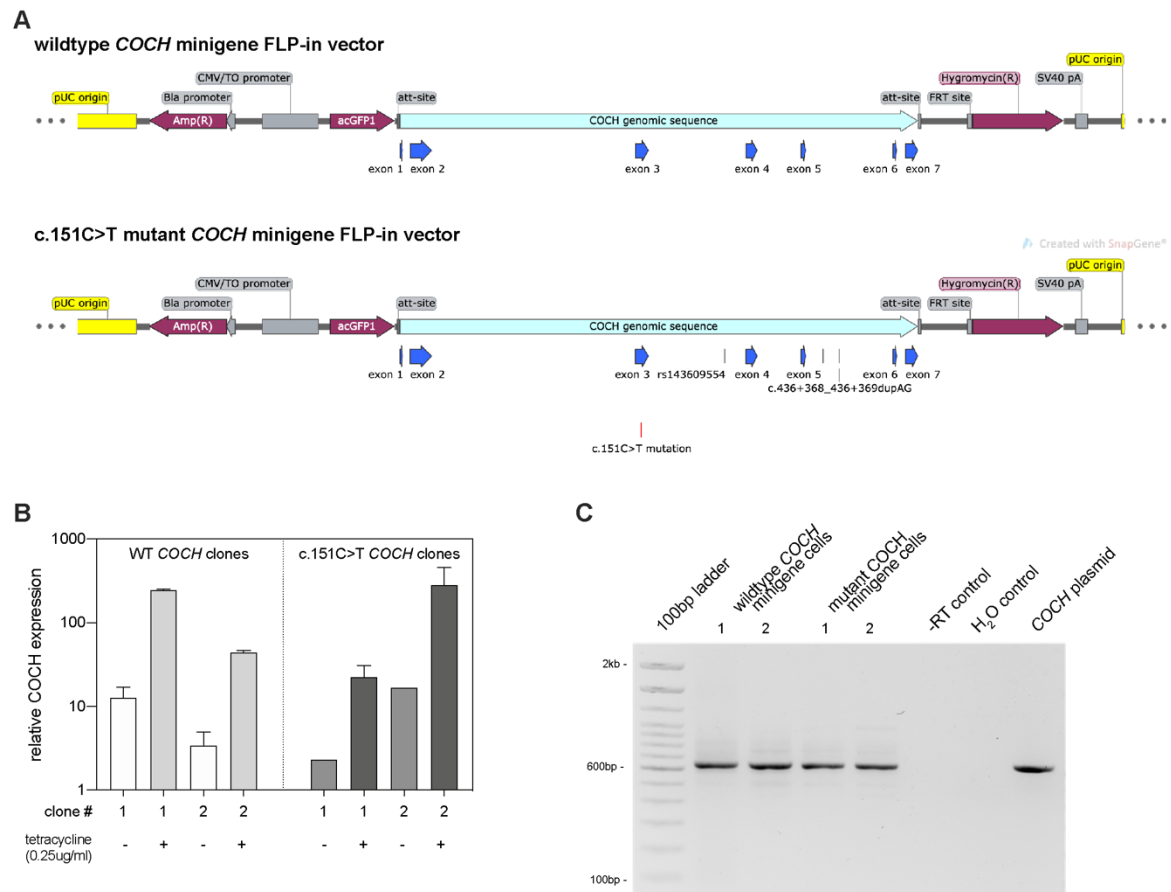

**Figure S2. Inducible *COCH* minigene T-REx 293T cells.** **A)** schematic overview of the wildtype and mutant *COCH* vectors that were used to establish the *COCH* minigene T-REx 293T cells. **B)** Measurement of *COCH* expression upon overnight induction with tetracycline. Two clones of wildtype *COCH* minigene-expressing transgenic cells, and two clones of mutant *COCH* minigene-expressing transgenic cells were investigated. Wildtype clone 2, and mutant clone 1 were selected for experiments based on the relatively similar levels of *COCH* expression upon tetracycline treatment. Note that uninduced cells always show a certain level of background *COCH* expression. As the Taqman™ probe for the mutant *COCH* transcript is highly specific, it appears that the transcriptional activity of the tetracycline promoter is not completely off in uninduced cells. Data shown as mean  $\pm$  SD. **C)** RT-PCR analysis of *COCH* transcripts in tetracycline-treated mutant and wildtype *COCH* minigene-expressing cells. For each cell line, two replicate samples are shown. Sanger sequencing of the amplicons confirmed correct splicing of the minigene *COCH* transcripts. The positive control is a plasmid containing the coding sequence of *COCH* that was amplified from fetal cochlear cDNA.

**Table S1: AON sequences and chemical and thermodynamic properties.** Phosphorothioate links in the AON sequences are indicated by the asterisks between bases. Variant c.436+368\_436+369dupAG is abbreviated in the table as dupAG. The 2'-O-methyl-RNA bases are placed between brackets. The allele-discriminating variants are indicated by bold underlined fonts. Secondary structure and free energy predictions are done with the RNAstructure webserver (<http://rna.urmc.rochester.edu/RNAstructureWeb/>). The RNAstructure webserver can not take the chemical modification or gapmer composition into account. Therefore, gapmers were analysed as both DNA and RNA molecules. # AONs were investigated in gapmer chemistry and complete PS-DNA chemistry

| AON name      | AON sequence                                                          | AON secondary structure free energy (kcal/mol) |               | self dimerisation (kcal/mol) |               | free energy of bimolecular structure (kcal/mol) |                      | Difference in free energy between mutant and wildtype bimolecular structure (kcal/mol) |
|---------------|-----------------------------------------------------------------------|------------------------------------------------|---------------|------------------------------|---------------|-------------------------------------------------|----------------------|----------------------------------------------------------------------------------------|
|               |                                                                       | <i>as DNA</i>                                  | <i>as RNA</i> | <i>as DNA</i>                | <i>as RNA</i> | <i>mutant COCH</i>                              | <i>wildtype COCH</i> |                                                                                        |
| c.151C>T      | AON-A (C*C*C*) T*G* <u><b>A</b></u> *G*C*A*G*A*G*G*A*C*A*T* (C*U*G)   | -1,9                                           | -3,0          | -7,1                         | -13,4         | -41,0                                           | -36,2                | 4,8                                                                                    |
|               | AON-B (C*U*G*) <u><b>A</b></u> *G*C*A*G*A*G*G*A*C*A*T*C*T* (G*C*U) #  | -5,3                                           | -7,5          | -12,6                        | -18,0         | -39,4                                           | -34,6                | 4,8                                                                                    |
|               | AON-C (C*C*C*C*) T*G* <u><b>A</b></u> *G*C*A*G*A*G*G*A*C* (A*U*C*U)   | 1,4                                            | -3,0          | -7,1                         | -14,2         | -41,7                                           | -36,9                | 4,8                                                                                    |
|               | AON-D T*G*A*G*C*A*G*A*G*G*A*C*A*T*C*T*G*C*T*T                         | -5,3                                           | -             | -12,6                        | -             | -37,8                                           | -33,0                | 4,8                                                                                    |
|               | AON-E (A*G*C*C*) C*C*C*T*G* <u><b>A</b></u> *G*C*A*G*A*G* (G*A*C*A) # | 1,4                                            | -3,0          | -6,3                         | -14,6         | -44,5                                           | -39,7                | 4,8                                                                                    |
|               | AON-F (C*C*U*G*) <u><b>A</b></u> *G*C*A*G*A*G*G*A*C*A*T* (C*U*G*C)    | -4,4                                           | -5,7          | -9,9                         | -14,4         | -41,1                                           | -36,3                | 4,8                                                                                    |
|               | AON-G G*C*A*G*C*C*C*C*T*G* <u><b>A</b></u> *G*C*A*G*A*G*G*A           | -0,8                                           | -             | -7,2                         | -             | -46,1                                           | -41,3                | 4,8                                                                                    |
| dupAG         | AON-A (U*C*A*U*) A*G*C*T*A*G*A*C* <u><b>C*T*C*T</b></u> * (G*U*C*U)   | -1,6                                           | -1,6          | -8,8                         | -9,1          | -36,1                                           | -27,0                | 9,1                                                                                    |
|               | AON-B (A*U*A*G*) C*T*A*G*A*C* <u><b>C*T*C*T</b></u> *G*T* (C*U*A*A) # | -2,2                                           | -3,7          | -8,8                         | -10,6         | -33,9                                           | -24,8                | 9,1                                                                                    |
|               | AON-C (A*U*C*A*) T*A*G*C*T*A*G*A*C* <u><b>C*T*C*</b></u> (U*G*U*C)    | -0,8                                           | 1,4           | -8,8                         | -8,9          | -35,6                                           | -26,6                | 9,0                                                                                    |
|               | AON-D C*A*U*C*A*T*A*G*C*T*A*G*A*C* <u><b>C*T*C*U</b></u> *G*U         | 1,5                                            | -             | -7,8                         | -             | -35,3                                           | -27,5                | 7,8                                                                                    |
|               | AON-E A*G*C*T*A*G*A*C* <u><b>C*T*C*T</b></u> *G*T*C*T*A*A*A           | -2,2                                           | -             | -8,8                         | -             | -33,3                                           | -24,2                | 9,1                                                                                    |
|               | AON-F (U*A*G*C*) T*A*G*A*C* <u><b>C*T*C*T</b></u> *G*T*C* (U*A*A*A)   | -2,2                                           | -3,7          | -8,8                         | -10,6         | -33,7                                           | -24,5                | 9,2                                                                                    |
|               | AON-G C*A*T*A*G*C*T*A*G*A*C* <u><b>C*T*C*T</b></u> *G*T*C*T*A         | -2,1                                           | -             | -8,8                         | -             | -35,5                                           | -26,9                | 8,6                                                                                    |
| scrambled AON | (G*C*T*A*) T*C*G*A*T*T*A*C*A*C*T*A* (T*C*G*A)                         | -2,3                                           | -3,6          | -7,4                         | -9,4          |                                                 |                      |                                                                                        |

**Table S2 - primer list for segregation analysis of identified allele-specific variants**

| variant                | forward primer       | reverse primer           | sequencing primer   |
|------------------------|----------------------|--------------------------|---------------------|
| c.151C>T               | CACTGTAGTCTCCCCACCAC | CAGATGGGTAAAGCAGGAAAG    |                     |
| c.240-239A>T           | TCACACCTGTAATCCCACCA | CCACACTTTTTTCAGGGCATC    |                     |
| c.436+185G>T           | ACAAGCAGTGTCCACAGCAC | CTGAACTTTGGGAGGCTGAA     | CCCGGCACAGCATTGGAAG |
| c.436+368_436+369dupAG |                      |                          |                     |
| c.629+1186T>C          | AGACCATCCTGGCTAACACG | TTTTCAAGCTTTCTATAATGAGCA |                     |
| c.629+1779delC         |                      |                          |                     |
| c.629+1807delA         | CCTGGCCCTTCAGTATTTT  | CTGAGCAGCTGGCACTACAG     |                     |
| c.629+1809A>C          |                      |                          |                     |
| c.629+1812A>T          |                      |                          |                     |
| c.630-208A>C           | GCTGTGTTTCATCAGGCAAA | TTGGAATTACCCCTCTGAA      |                     |
| c.734-304T>G           | GAATGCAGATGTGGCAGAAA | GATGCATCAGCTGGGAAAGT     |                     |
| c.1477+9C>A            | TGGTGGAACAGCTACTGGTG | TGGTGGAACAGCTACTGGTG     |                     |
